# Supplementary material for: User-Validated Drought Vulnerability Factors in Forested Cold Climates: Multi-Sectoral Perspectives from Sweden
Source: Copernicus journal article supplement (doi:10.5194/egusphere-2024-1988), 2024-08-14
Supplement: Supplementary file 1 [file egusphere-2024-1988-supplement.pdf]

## 1 S1 – Sectoral vulnerability factors, their subcategories and impact scores

| <i>Sectoral Vulnerability factor</i>                       | <i>Subcategory</i> | <i>Agricultural</i> | <i>Energy</i> | <i>Environmental</i> | <i>Forestry</i> | <i>Water resources</i> | <i>Water supply</i> | <i>All sectors</i> |
|------------------------------------------------------------|--------------------|---------------------|---------------|----------------------|-----------------|------------------------|---------------------|--------------------|
| <i>(A) Dynamic models for decision support</i>             | Tools              | 0,42                | 0,33          | 0,68                 | 0,50            | 0,78                   | 0,44                | 0,56               |
| <i>(A) Funding for small scale water projects</i>          | Supply             | 0,75                | 0,20          | 0,65                 | 0,32            | 0,71                   | 0,35                | 0,54               |
| <i>(A) Local knowledge about adaptive approaches</i>       | Tools              | 0,71                | 0,58          | 0,66                 | 0,58            | 0,70                   | 0,63                | 0,65               |
| <i>(A) Local resolution risk modelling</i>                 | Tools              | 0,64                | 0,46          | 0,67                 | 0,50            | 0,79                   | 0,69                | 0,65               |
| <i>(A) Possibilities for development of water storage</i>  | Supply             | 0,85                | 0,70          | 0,68                 | 0,23            | 0,79                   | 0,81                | 0,68               |
| <i>(A) Scientists employed in sector</i>                   | Tools              | 0,61                | 0,38          | 0,45                 | 0,48            | 0,59                   | 0,43                | 0,49               |
| <i>(A) Species shift for climate adaptation (forests)</i>  | Species            | 0,44                | 0,13          | 0,64                 | 0,73            | 0,54                   | 0,21                | 0,56               |
| <i>(A) Species suitable for future drought projections</i> | Species            | 0,72                | 0,10          | 0,64                 | 0,58            | 0,50                   | 0,35                | 0,55               |
| <i>(A) Use of adaptive measures</i>                        | Tools              | 0,79                | 0,43          | 0,74                 | 0,67            | 0,80                   | 0,65                | 0,71               |
| <i>(C) Ability to apply for and receive funds</i>          | Funds              | 0,64                | 0,25          | 0,58                 | 0,29            | 0,48                   | 0,35                | 0,48               |
| <i>(C) Alternative water source &amp; water supply</i>     | Supply             | 0,81                | 0,60          | 0,76                 | 0,18            | 0,79                   | 0,83                | 0,70               |
| <i>(C) Apt size of water permits to sustain irrigation</i> | Irrigation         | 0,88                | 0,30          | 0,64                 | 0,13            | 0,73                   | 0,58                | 0,57               |
| <i>(C) Permanent water restrictions</i>                    | Supply             | 0,89                | 0,60          | 0,67                 | 0,28            | 0,52                   | 0,71                | 0,63               |
| <i>(C) Regional water distribution networks</i>            | Supply             | 0,50                | 0,25          | 0,58                 | 0,18            | 0,71                   | 0,77                | 0,55               |
| <i>(C) Sectoral actor's level of available assets</i>      | Funds              | 0,80                | 0,50          | 0,60                 | 0,31            | 0,63                   | 0,83                | 0,63               |
| <i>(C) Use of effective irrigation systems</i>             | Irrigation         | 0,98                | 0,25          | 0,56                 | 0,09            | 0,70                   | 0,64                | 0,55               |
| <i>(C) Use of irrigation</i>                               | Irrigation         | 0,94                | 0,25          | 0,51                 | 0,11            | 0,65                   | 0,56                | 0,51               |
| <i>(C) Water available for irrigation during drought</i>   | Irrigation         | 0,98                | 0,30          | 0,61                 | 0,07            | 0,67                   | 0,67                | 0,57               |
| <i>(S) Access to public drinking water service</i>         | Supply             | 0,75                | 0,15          | 0,73                 | 0,20            | 0,79                   | 0,88                | 0,66               |
| <i>(S) Baseline water stress</i>                           | Stress             | 0,92                | 0,63          | 0,84                 | 0,35            | 0,94                   | 0,80                | 0,79               |
| <i>(S) Competing water interests</i>                       | Stress             | 0,81                | 0,60          | 0,72                 | 0,23            | 0,77                   | 0,75                | 0,68               |
| <i>(S) Dependency on sector as only source of income</i>   | Funds              | 0,86                | 0,40          | 0,45                 | 0,33            | 0,44                   | 0,79                | 0,56               |
| <i>(S) Deteriorating ecosystems</i>                        | Stress             | 0,58                | 0,25          | 0,79                 | 0,48            | 0,66                   | 0,46                | 0,62               |
| <i>(S) Distribution of hydropower plants</i>               | Supply             | 0,54                | 0,68          | 0,57                 | 0,13            | 0,65                   | 0,58                | 0,55               |
| <i>(S) Drought resilient seedlings</i>                     | Species            | 0,83                | 0,15          | 0,61                 | 0,73            | 0,55                   | 0,39                | 0,61               |
| <i>(S) Drought resilient stand mixtures</i>                | Species            | 0,81                | 0,20          | 0,67                 | 0,70            | 0,57                   | 0,50                | 0,63               |
| <i>(S) Drought tolerance of current species</i>            | Species            | 0,90                | 0,25          | 0,76                 | 0,75            | 0,68                   | 0,47                | 0,70               |
| <i>(S) Fragmented forests or forests of small size</i>     | Stress             | 0,40                | 0,13          | 0,65                 | 0,41            | 0,44                   | 0,25                | 0,47               |
| <i>(S) Growth limiting conditions</i>                      | Setting            | 0,90                | 0,25          | 0,64                 | 0,79            | 0,68                   | 0,69                | 0,70               |
| <i>(S) Land and soil degradation</i>                       | Stress             | 0,60                | 0,10          | 0,70                 | 0,27            | 0,42                   | 0,58                | 0,52               |
| <i>(S) Level of groundwater exploitation</i>               | Stress             | 0,80                | 0,50          | 0,79                 | 0,41            | 0,75                   | 0,77                | 0,71               |
| <i>(S) Monocultures</i>                                    | Species            | 0,55                | 0,13          | 0,68                 | 0,59            | 0,48                   | 0,25                | 0,55               |
| <i>(S) Possibility to expand irrigation practices</i>      | Supply             | 0,90                | 0,30          | 0,52                 | 0,06            | 0,52                   | 0,58                | 0,49               |
| <i>(S) Presence of forest &amp; forest vegetation</i>      | Setting            | 0,50                | 0,50          | 0,72                 | 0,57            | 0,73                   | 0,39                | 0,62               |
| <i>(S) Presence of wetlands, lakes and ponds</i>           | Setting            | 0,63                | 0,75          | 0,91                 | 0,56            | 0,88                   | 0,77                | 0,78               |
| <i>(S) Productivity of land</i>                            | Setting            | 0,88                | 0,00          | 0,50                 | 0,40            | 0,36                   | 0,50                | 0,50               |
| <i>(S) Proportion of fertile soils</i>                     | Setting            | 0,85                | 0,10          | 0,48                 | 0,40            | 0,42                   | 0,39                | 0,49               |
| <i>(S) Reliable water resource for water supply</i>        | Supply             | 0,92                | 0,40          | 0,75                 | 0,23            | 0,87                   | 0,83                | 0,73               |

*(S) Sectoral actor's level of solvency*

*(S) Shallow rooted crops/species*

*(S) Soil water holding capacity*

*(S) Species outside its natural range*

*(S) The elevation*

*(S) The geographical characteristics*

*(S) Water dependent ecosystems*

*(S) Water quality deterioration*

|         |      |      |      |      |      |      |      |
|---------|------|------|------|------|------|------|------|
| Funds   | 0,88 | 0,35 | 0,29 | 0,21 | 0,25 | 0,75 | 0,48 |
| Species | 0,73 | 0,15 | 0,59 | 0,65 | 0,50 | 0,32 | 0,55 |
| Setting | 0,92 | 0,65 | 0,82 | 0,75 | 0,82 | 0,73 | 0,80 |
| Species | 0,29 | 0,10 | 0,60 | 0,50 | 0,41 | 0,15 | 0,44 |
| Setting | 0,31 | 0,70 | 0,54 | 0,44 | 0,69 | 0,59 | 0,53 |
| Setting | 0,73 | 0,75 | 0,73 | 0,71 | 0,75 | 0,86 | 0,75 |
| Setting | 0,68 | 0,50 | 0,88 | 0,44 | 0,81 | 0,63 | 0,72 |
| Stress  | 0,68 | 0,25 | 0,78 | 0,25 | 0,71 | 0,77 | 0,66 |

2

3

## S2 – Governance vulnerability factors, their subcategories, and impact scores

| <i>Governance Vulnerability factor</i>                                 | <i>Subcategory</i> | <i>Society</i> | <i>Agricultural</i> | <i>Energy</i> | <i>Environmental</i> | <i>Forestry</i> | <i>Water intensive industry</i> | <i>Water resources</i> | <i>Water supply</i> | <i>All sectors</i> |
|------------------------------------------------------------------------|--------------------|----------------|---------------------|---------------|----------------------|-----------------|---------------------------------|------------------------|---------------------|--------------------|
| <i>(A) Availability of drought risk assessment</i>                     | Tools              | 0,70           | 0,61                | 0,54          | 0,71                 | 0,60            | 0,50                            | 0,79                   | 0,71                | 0,69               |
| <i>(A) Building standards relating to water efficiency</i>             | Policies           | 0,66           | 0,46                | 0,30          | 0,61                 | 0,17            | 0,50                            | 0,58                   | 0,68                | 0,60               |
| <i>(A) Drought early warning systems</i>                               | Tools              | 0,69           | 0,73                | 0,38          | 0,55                 | 0,42            | 0,50                            | 0,66                   | 0,65                | 0,63               |
| <i>(A) Drought monitoring schemes</i>                                  | Tools              | 0,74           | 0,68                | 0,38          | 0,66                 | 0,44            | 0,50                            | 0,68                   | 0,65                | 0,67               |
| <i>(A) Groundwater monitoring</i>                                      | Tools              | 0,79           | 0,71                | 0,45          | 0,71                 | 0,46            | 0,50                            | 0,80                   | 0,77                | 0,73               |
| <i>(A) Long-term supply &amp; demand assessments</i>                   | Tools              | 0,78           | 0,69                | 0,63          | 0,79                 | 0,50            | 0,50                            | 0,88                   | 0,77                | 0,75               |
| <i>(A) Planned drought prevention measures (authority level)</i>       | Policies           | 0,79           | 0,65                | 0,65          | 0,76                 | 0,46            | 0,50                            | 0,81                   | 0,63                | 0,74               |
| <i>(A) Real time DRA and DRM tools</i>                                 | Tools              | 0,71           | 0,75                | 0,29          | 0,61                 | 0,48            | 0,50                            | 0,69                   | 0,66                | 0,66               |
| <i>(A) Relevant data regarding drought</i>                             | Tools              | 0,73           | 0,81                | 0,71          | 0,71                 | 0,50            | 0,50                            | 0,79                   | 0,68                | 0,71               |
| <i>(C) Collaborative decision making &amp; development (authority)</i> | Governance         | 0,72           | 0,64                | 0,44          | 0,73                 | 0,35            | 0,50                            | 0,75                   | 0,72                | 0,69               |
| <i>(C) Competence-level within authorities*</i>                        | Governance         | 0,74           | 0,84                | 0,25          | 0,63                 | 0,58            | 0,50                            | 0,70                   | 0,67                | 0,70               |
| <i>(C) Coordinated Water Strategy (authority level)</i>                | Policies           | 0,77           | 0,64                | 0,70          | 0,78                 | 0,25            | 0,50                            | 0,87                   | 0,67                | 0,74               |
| <i>(C) Coordination &amp; cooperation among authorities*</i>           | Governance         | 0,74           | 0,75                | 0,33          | 0,64                 | 0,41            | 0,50                            | 0,61                   | 0,66                | 0,68               |
| <i>(C) Decision support systems regarding drought</i>                  | Tools              | 0,72           | 0,66                | 0,46          | 0,69                 | 0,58            | 0,50                            | 0,79                   | 0,67                | 0,69               |
| <i>(C) Defined water use rights</i>                                    | Policies           | 0,77           | 0,67                | 0,88          | 0,74                 | 0,21            | 0,50                            | 0,81                   | 0,73                | 0,73               |
| <i>(C) Drought awareness within authorities</i>                        | Governance         | 0,76           | 0,77                | 0,67          | 0,71                 | 0,50            | 0,50                            | 0,85                   | 0,71                | 0,73               |
| <i>(C) Drought plan incl raising awareness (authority level)</i>       | Policies           | 0,75           | 0,60                | 0,44          | 0,74                 | 0,42            | 0,50                            | 0,83                   | 0,68                | 0,71               |
| <i>(C) Financial capacity of the government*</i>                       | Governance         | 0,65           | 0,77                | 0,25          | 0,60                 | 0,33            | 0,50                            | 0,55                   | 0,52                | 0,61               |
| <i>(C) Local water management plan</i>                                 | Policies           | 0,77           | 0,73                | 0,65          | 0,80                 | 0,25            | 0,50                            | 0,88                   | 0,70                | 0,75               |
| <i>(C) Presence of a DMP</i>                                           | Policies           | 0,75           | 0,58                | 0,63          | 0,76                 | 0,42            | 0,50                            | 0,77                   | 0,72                | 0,72               |

*(C) Social/physical capacity within authorities\**

*(C) Water transfer and drought policies*

*(C) Water use priority classes in authority level DMP*

|            |      |      |      |      |      |      |      |      |  |      |
|------------|------|------|------|------|------|------|------|------|--|------|
| Governance | 0,63 |      |      |      |      |      |      |      |  | 0,63 |
| Policies   | 0,73 | 0,70 | 0,50 | 0,69 | 0,25 | 0,50 | 0,81 | 0,67 |  | 0,69 |
| Policies   | 0,77 | 0,78 | 0,63 | 0,71 | 0,29 | 0,50 | 0,77 | 0,73 |  | 0,73 |

**S3 - Governance vulnerability factors, their subcategories, and impact scores**

| <i>Societal vulnerability factors</i>                      | <i>subcategory</i> | <i>Society</i> |
|------------------------------------------------------------|--------------------|----------------|
| <i>(C) Drought awareness among water users</i>             | Setting            | 0,75           |
| <i>(S) Access to public drinking water service</i>         | Supply             | 0,75           |
| <i>(S) Size of population</i>                              | Setting            | 0,69           |
| <i>(S) Size of town</i>                                    | Setting            | 0,67           |
| <i>(S) Societal financial dependency on DWC industries</i> | Setting            | 0,77           |

#### S4- Overview of respondent characteristics

| <i>Sector</i>          | <i>Gender identity</i> |          |           | <i>Place of employment</i> |                   |            |                 |                          | <i>Work experience</i> |                 |                   | <i>Drought experience</i> |            |            | <i>Geographical location</i> |              |
|------------------------|------------------------|----------|-----------|----------------------------|-------------------|------------|-----------------|--------------------------|------------------------|-----------------|-------------------|---------------------------|------------|------------|------------------------------|--------------|
|                        | <b>F</b>               | <b>M</b> | <b>NA</b> | <b>Authority</b>           | <b>Enterprise</b> | <b>NGO</b> | <b>Research</b> | <b>Trade association</b> | <b>0-5 yrs</b>         | <b>5-10 yrs</b> | <b>&gt;10 yrs</b> | <b>1-2</b>                | <b>2-4</b> | <b>3-4</b> | <b>North</b>                 | <b>South</b> |
| <i>Agricultural</i>    | 10                     | 3        |           | 2                          | 1                 |            | 5               | 5                        | 4                      | 2               | 7                 | 1                         | 2          | 10         | 1                            | 12           |
| <i>Energy</i>          | 1                      | 6        |           | 1                          | 4                 |            | 1               | 1                        | 2                      | 1               | 4                 | 1                         | 1          | 5          | 2                            | 5            |
| <i>Environmental</i>   | 15                     | 16       | 4         | 29                         |                   | 1          | 5               |                          | 10                     | 5               | 20                | 8                         | 14         | 13         | 7                            | 28           |
| <i>Forestry</i>        | 1                      | 12       | 1         | 4                          | 4                 |            | 6               |                          | 1                      | 1               | 12                |                           | 3          | 11         | 4                            | 10           |
| <i>Water resources</i> | 8                      | 6        | 1         | 11                         | 1                 | 1          | 2               |                          | 2                      | 9               | 4                 | 3                         | 4          | 8          |                              | 15           |
| <i>Water supply</i>    | 8                      | 7        | 1         | 14                         | 1                 |            |                 | 1                        | 2                      | 2               | 12                | 3                         | 3          | 10         | 2                            | 14           |

  

| <i>Organization</i>      | <i>Gender identity</i> |          |           | <i>Work experience</i> |                 |                   | <i>Geographical location</i> |              | <i>Drought experience</i> |          |            |
|--------------------------|------------------------|----------|-----------|------------------------|-----------------|-------------------|------------------------------|--------------|---------------------------|----------|------------|
|                          | <b>F</b>               | <b>M</b> | <b>NA</b> | <b>0-5 yrs</b>         | <b>5-10 yrs</b> | <b>&gt;10 yrs</b> | <b>North</b>                 | <b>South</b> | <b>1-2</b>                | <b>2</b> | <b>3-4</b> |
| <i>Authority</i>         | 32                     | 25       | 5         | 16                     | 15              | 31                | 9                            | 53           | 14                        | 19       | 29         |
| <i>Company</i>           | 2                      | 9        | 1         | 2                      | 3               | 7                 | 5                            | 7            |                           | 4        | 8          |
| <i>NGO</i>               |                        | 2        |           | 1                      |                 | 1                 |                              | 2            | 1                         |          | 1          |
| <i>Research</i>          | 6                      | 12       | 1         | 1                      | 1               | 17                | 2                            | 17           | 1                         | 5        | 13         |
| <i>Trade association</i> | 4                      | 3        |           | 1                      | 2               | 4                 |                              | 7            | 1                         |          | 6          |

  

| <i>Geographical location</i> | <i>Gender identity</i> |          |           | <i>Work experience</i> |                 |                   | <i>Drought experience</i> |          |            |
|------------------------------|------------------------|----------|-----------|------------------------|-----------------|-------------------|---------------------------|----------|------------|
|                              | <b>F</b>               | <b>M</b> | <b>NA</b> | <b>0-5 yrs</b>         | <b>5-10 yrs</b> | <b>&gt;10 yrs</b> | <b>1-2</b>                | <b>2</b> | <b>3-4</b> |
| <i>North</i>                 | 6                      | 9        | 1         | 5                      | 2               | 9                 | 4                         | 6        | 6          |
| <i>South</i>                 | 38                     | 42       | 6         | 16                     | 19              | 51                | 13                        | 22       | 51         |

**S5 – Number of respondents per sector as well as primary field of focus within the sector**

| <i>Sector and primary focus</i>                              | <i>Respondents (n)</i> |
|--------------------------------------------------------------|------------------------|
| <b><i>Agricultural</i></b>                                   | <b>13</b>              |
| <i>Crop production</i>                                       | 7                      |
| <i>Advocacy activities for green industries</i>              | 1                      |
| <i>Crop and vegetable production, &amp; animal husbandry</i> | 1                      |
| <i>Animal husbandry &amp; production</i>                     | 2                      |
| <i>Food strategy</i>                                         | 1                      |
| <i>Other</i>                                                 | 1                      |
| <b><i>Energy</i></b>                                         | <b>7</b>               |
| <i>Hydropower</i>                                            | 6                      |
| <i>Other</i>                                                 | 1                      |
| <b><i>Environmental</i></b>                                  | <b>35</b>              |
| <i>Aquatic ecosystems</i>                                    | 9                      |
| <i>Both aquatic &amp; terrestrial ecosystems</i>             | 16                     |
| <i>Terrestrial ecosystems</i>                                | 10                     |
| <b><i>Forestry</i></b>                                       | <b>14</b>              |
| -                                                            | 1                      |
| <i>Both production and nature conservation</i>               | 1                      |
| <i>Ecosystem services</i>                                    | 1                      |
| <i>Nature conservation</i>                                   | 4                      |
| <i>Production</i>                                            | 6                      |
| <i>Research</i>                                              | 1                      |
| <b><i>Unspecified</i></b>                                    | <b>1</b>               |
| -                                                            | 1                      |
| <b><i>Water intensive industry</i></b>                       | <b>1</b>               |
| <i>Paper- &amp; pulp industry</i>                            | 1                      |
| <b><i>Water resources</i></b>                                | <b>15</b>              |
| <i>Exercise of authority</i>                                 | 1                      |
| <i>Society</i>                                               | 1                      |
| <i>Water management</i>                                      | 1                      |
| <i>Water quality effects in physical planning</i>            | 1                      |
| <i>Water resource management</i>                             | 11                     |
| <b><i>Water supply</i></b>                                   | <b>16</b>              |
| <i>Drinking water production &amp; distribution</i>          | 16                     |
| <b><i>Grand Total</i></b>                                    | <b>102</b>             |

**S6 –Significant differences in sectoral factor ratings (p-value <0.05) based on pairwise Wilcoxon Rank sum test, with corrections for multiple testing, using the Benjamini-Hochberg method for p-value adjustment.**

| <i>Sectoral vulnerability factor</i>                   | <i>Sectors</i>  |                 | <i>p-value</i> | <i>Subcategory</i> |
|--------------------------------------------------------|-----------------|-----------------|----------------|--------------------|
| <i>Funding for small scale water projects</i>          | Energy          | Agricultural    | 0,0142         | Supply             |
| <i>Funding for small scale water projects</i>          | Environmental   | Energy          | 0,0142         | Supply             |
| <i>Funding for small scale water projects</i>          | Forestry        | Agricultural    | 0,0142         | Supply             |
| <i>Funding for small scale water projects</i>          | Forestry        | Environmental   | 0,0142         | Supply             |
| <i>Funding for small scale water projects</i>          | Water resources | Energy          | 0,0142         | Supply             |
| <i>Funding for small scale water projects</i>          | Water resources | Forestry        | 0,0142         | Supply             |
| <i>Funding for small scale water projects</i>          | Water supply    | Agricultural    | 0,0157         | Supply             |
| <i>Funding for small scale water projects</i>          | Water supply    | Environmental   | 0,0142         | Supply             |
| <i>Funding for small scale water projects</i>          | Water supply    | Water resources | 0,0142         | Supply             |
| <i>Species shift for climate adaptation (forests)</i>  | Forestry        | Energy          | 0,0180         | Species            |
| <i>Species shift for climate adaptation (forests)</i>  | Water supply    | Forestry        | 0,0180         | Species            |
| <i>Sectoral actor's level of available assets</i>      | Forestry        | Agricultural    | 0,0096         | Funds              |
| <i>Sectoral actor's level of available assets</i>      | Water supply    | Forestry        | 0,0079         | Funds              |
| <i>Sectoral actor's level of solvency</i>              | Energy          | Agricultural    | 0,0148         | Funds              |
| <i>Sectoral actor's level of solvency</i>              | Environmental   | Agricultural    | 0,0048         | Funds              |
| <i>Sectoral actor's level of solvency</i>              | Forestry        | Agricultural    | 0,0046         | Funds              |
| <i>Sectoral actor's level of solvency</i>              | Water resources | Agricultural    | 0,0101         | Funds              |
| <i>Sectoral actor's level of solvency</i>              | Water supply    | Energy          | 0,0395         | Funds              |
| <i>Sectoral actor's level of solvency</i>              | Water supply    | Environmental   | 0,0148         | Funds              |
| <i>Sectoral actor's level of solvency</i>              | Water supply    | Forestry        | 0,0046         | Funds              |
| <i>Sectoral actor's level of solvency</i>              | Water supply    | Water resources | 0,0302         | Funds              |
| <i>Dependency on sector as only source of income</i>   | Forestry        | Agricultural    | 0,0351         | Funds              |
| <i>Apt size of water permits to sustain irrigation</i> | Energy          | Agricultural    | 0,0126         | Irrigation         |
| <i>Apt size of water permits to sustain irrigation</i> | Environmental   | Agricultural    | 0,0432         | Irrigation         |
| <i>Apt size of water permits to sustain irrigation</i> | Forestry        | Agricultural    | 0,0005         | Irrigation         |
| <i>Apt size of water permits to sustain irrigation</i> | Forestry        | Environmental   | 0,0021         | Irrigation         |
| <i>Apt size of water permits to sustain irrigation</i> | Water resources | Forestry        | 0,0021         | Irrigation         |
| <i>Apt size of water permits to sustain irrigation</i> | Water supply    | Agricultural    | 0,0301         | Irrigation         |
| <i>Apt size of water permits to sustain irrigation</i> | Water supply    | Forestry        | 0,0055         | Irrigation         |
| <i>Use of effective irrigation systems</i>             | Energy          | Agricultural    | 0,0010         | Irrigation         |
| <i>Use of effective irrigation systems</i>             | Environmental   | Agricultural    | 0,0003         | Irrigation         |
| <i>Use of effective irrigation systems</i>             | Forestry        | Agricultural    | 0,0000         | Irrigation         |
| <i>Use of effective irrigation systems</i>             | Forestry        | Environmental   | 0,0003         | Irrigation         |
| <i>Use of effective irrigation systems</i>             | Water resources | Agricultural    | 0,0290         | Irrigation         |
| <i>Use of effective irrigation systems</i>             | Water resources | Forestry        | 0,0008         | Irrigation         |
| <i>Use of effective irrigation systems</i>             | Water supply    | Agricultural    | 0,0034         | Irrigation         |
| <i>Use of effective irrigation systems</i>             | Water supply    | Forestry        | 0,0014         | Irrigation         |
| <i>Use of irrigation</i>                               | Energy          | Agricultural    | 0,0022         | Irrigation         |
| <i>Use of irrigation</i>                               | Environmental   | Agricultural    | 0,0007         | Irrigation         |
| <i>Use of irrigation</i>                               | Forestry        | Agricultural    | 0,0001         | Irrigation         |



|                                                      |                 |               |        |            |
|------------------------------------------------------|-----------------|---------------|--------|------------|
| <i>Use of irrigation</i>                             | Forestry        | Environmental | 0,0007 | Irrigation |
| <i>Use of irrigation</i>                             | Water resources | Agricultural  | 0,0101 | Irrigation |
| <i>Use of irrigation</i>                             | Water resources | Energy        | 0,0400 | Irrigation |
| <i>Use of irrigation</i>                             | Water resources | Forestry      | 0,0007 | Irrigation |
| <i>Use of irrigation</i>                             | Water supply    | Agricultural  | 0,0033 | Irrigation |
| <i>Use of irrigation</i>                             | Water supply    | Forestry      | 0,0033 | Irrigation |
| <i>Water available for irrigation during drought</i> | Energy          | Agricultural  | 0,0006 | Irrigation |
| <i>Water available for irrigation during drought</i> | Environmental   | Agricultural  | 0,0005 | Irrigation |
| <i>Water available for irrigation during drought</i> | Forestry        | Agricultural  | 0,0000 | Irrigation |
| <i>Water available for irrigation during drought</i> | Forestry        | Environmental | 0,0001 | Irrigation |
| <i>Water available for irrigation during drought</i> | Water resources | Agricultural  | 0,0271 | Irrigation |
| <i>Water available for irrigation during drought</i> | Water resources | Forestry      | 0,0008 | Irrigation |
| <i>Water available for irrigation during drought</i> | Water supply    | Agricultural  | 0,0022 | Irrigation |
| <i>Water available for irrigation during drought</i> | Water supply    | Forestry      | 0,0004 | Irrigation |
| <i>Possibility to expand irrigation practices</i>    | Energy          | Agricultural  | 0,0076 | Supply     |
| <i>Possibility to expand irrigation practices</i>    | Environmental   | Agricultural  | 0,0076 | Supply     |
| <i>Possibility to expand irrigation practices</i>    | Forestry        | Agricultural  | 0,0001 | Supply     |
| <i>Possibility to expand irrigation practices</i>    | Forestry        | Environmental | 0,0007 | Supply     |
| <i>Possibility to expand irrigation practices</i>    | Water resources | Agricultural  | 0,0108 | Supply     |
| <i>Possibility to expand irrigation practices</i>    | Water resources | Forestry      | 0,0032 | Supply     |
| <i>Possibility to expand irrigation practices</i>    | Water supply    | Agricultural  | 0,0103 | Supply     |
| <i>Possibility to expand irrigation practices</i>    | Water supply    | Forestry      | 0,0007 | Supply     |
| <i>Land and soil degradation</i>                     | Energy          | Agricultural  | 0,0434 | Stress     |
| <i>Land and soil degradation</i>                     | Environmental   | Energy        | 0,0099 | Stress     |
| <i>Land and soil degradation</i>                     | Forestry        | Environmental | 0,0099 | Stress     |
| <i>Land and soil degradation</i>                     | Water supply    | Energy        | 0,0434 | Stress     |
| <i>Productivity of land</i>                          | Energy          | Agricultural  | 0,0032 | Setting    |
| <i>Productivity of land</i>                          | Environmental   | Agricultural  | 0,0032 | Setting    |
| <i>Productivity of land</i>                          | Environmental   | Energy        | 0,0032 | Setting    |
| <i>Productivity of land</i>                          | Forestry        | Agricultural  | 0,0032 | Setting    |
| <i>Productivity of land</i>                          | Forestry        | Energy        | 0,0122 | Setting    |
| <i>Productivity of land</i>                          | Water resources | Agricultural  | 0,0050 | Setting    |
| <i>Productivity of land</i>                          | Water supply    | Agricultural  | 0,0050 | Setting    |
| <i>Productivity of land</i>                          | Water supply    | Energy        | 0,0050 | Setting    |
| <i>Proportion of fertile soils</i>                   | Energy          | Agricultural  | 0,0077 | Setting    |
| <i>Proportion of fertile soils</i>                   | Environmental   | Agricultural  | 0,0077 | Setting    |
| <i>Proportion of fertile soils</i>                   | Environmental   | Energy        | 0,0336 | Setting    |
| <i>Proportion of fertile soils</i>                   | Forestry        | Agricultural  | 0,0157 | Setting    |
| <i>Proportion of fertile soils</i>                   | Water resources | Agricultural  | 0,0209 | Setting    |
| <i>Proportion of fertile soils</i>                   | Water supply    | Agricultural  | 0,0157 | Setting    |
| <i>Drought resilient seedlings</i>                   | Energy          | Agricultural  | 0,0301 | Species    |
| <i>Drought resilient seedlings</i>                   | Environmental   | Energy        | 0,0375 | Species    |
| <i>Drought resilient seedlings</i>                   | Forestry        | Energy        | 0,0375 | Species    |
| <i>Drought resilient seedlings</i>                   | Water supply    | Agricultural  | 0,0375 | Species    |

|                                                        |                 |               |        |         |
|--------------------------------------------------------|-----------------|---------------|--------|---------|
| <i>Drought resilient stand mixtures</i>                | Energy          | Agricultural  | 0,0442 | Species |
| <i>Drought resilient stand mixtures</i>                | Environmental   | Energy        | 0,0442 | Species |
| <i>Drought resilient stand mixtures</i>                | Forestry        | Energy        | 0,0442 | Species |
| <i>Shallow rooted crops/species</i>                    | Energy          | Agricultural  | 0,0378 | Species |
| <i>Shallow rooted crops/species</i>                    | Forestry        | Energy        | 0,0378 | Species |
| <i>Shallow rooted crops/species</i>                    | Water supply    | Agricultural  | 0,0378 | Species |
| <i>Species suitable for future drought projections</i> | Energy          | Agricultural  | 0,0470 | Species |
| <i>Species suitable for future drought projections</i> | Environmental   | Energy        | 0,0470 | Species |
| <i>Drought tolerance of current species</i>            | Energy          | Agricultural  | 0,0234 | Species |
| <i>Drought tolerance of current species</i>            | Environmental   | Energy        | 0,0267 | Species |
| <i>Drought tolerance of current species</i>            | Forestry        | Energy        | 0,0281 | Species |
| <i>Drought tolerance of current species</i>            | Water supply    | Agricultural  | 0,0358 | Species |
| <i>Deteriorating ecosystems</i>                        | Environmental   | Energy        | 0,0196 | Stress  |
| <i>Deteriorating ecosystems</i>                        | Forestry        | Environmental | 0,0240 | Stress  |
| <i>Deteriorating ecosystems</i>                        | Water supply    | Environmental | 0,0240 | Stress  |
| <i>Presence of wetlands, lakes and ponds</i>           | Environmental   | Agricultural  | 0,0078 | Setting |
| <i>Presence of wetlands, lakes and ponds</i>           | Forestry        | Environmental | 0,0011 | Setting |
| <i>Presence of wetlands, lakes and ponds</i>           | Water resources | Forestry      | 0,0175 | Setting |
| <i>Water dependent ecosystems</i>                      | Forestry        | Environmental | 0,0003 | Setting |
| <i>Water dependent ecosystems</i>                      | Water resources | Forestry      | 0,0218 | Setting |
| <i>Water dependent ecosystems</i>                      | Water supply    | Environmental | 0,0218 | Setting |
| <i>Water quality deterioration</i>                     | Environmental   | Energy        | 0,0105 | Stress  |
| <i>Water quality deterioration</i>                     | Forestry        | Agricultural  | 0,0105 | Stress  |
| <i>Water quality deterioration</i>                     | Forestry        | Environmental | 0,0003 | Stress  |
| <i>Water quality deterioration</i>                     | Water resources | Forestry      | 0,0141 | Stress  |
| <i>Water quality deterioration</i>                     | Water supply    | Energy        | 0,0308 | Stress  |
| <i>Water quality deterioration</i>                     | Water supply    | Forestry      | 0,0061 | Stress  |
| <i>Access to public drinking water service</i>         | Energy          | Agricultural  | 0,0163 | Supply  |
| <i>Access to public drinking water service</i>         | Environmental   | Energy        | 0,0064 | Supply  |
| <i>Access to public drinking water service</i>         | Forestry        | Agricultural  | 0,0042 | Supply  |
| <i>Access to public drinking water service</i>         | Forestry        | Environmental | 0,0009 | Supply  |
| <i>Access to public drinking water service</i>         | Water resources | Energy        | 0,0103 | Supply  |
| <i>Access to public drinking water service</i>         | Water resources | Forestry      | 0,0025 | Supply  |
| <i>Access to public drinking water service</i>         | Water supply    | Energy        | 0,0042 | Supply  |
| <i>Access to public drinking water service</i>         | Water supply    | Forestry      | 0,0009 | Supply  |
| <i>Level of groundwater exploitation</i>               | Forestry        | Agricultural  | 0,0499 | Stress  |
| <i>Level of groundwater exploitation</i>               | Forestry        | Environmental | 0,0169 | Stress  |
| <i>Level of groundwater exploitation</i>               | Water resources | Forestry      | 0,0499 | Stress  |
| <i>Level of groundwater exploitation</i>               | Water supply    | Forestry      | 0,0499 | Stress  |
| <i>Possibilities for development of water storage</i>  | Forestry        | Agricultural  | 0,0008 | Supply  |
| <i>Possibilities for development of water storage</i>  | Forestry        | Environmental | 0,0011 | Supply  |
| <i>Possibilities for development of water storage</i>  | Water resources | Forestry      | 0,0008 | Supply  |
| <i>Possibilities for development of water storage</i>  | Water supply    | Forestry      | 0,0008 | Supply  |
| <i>Alternative water source &amp; water supply</i>     | Forestry        | Agricultural  | 0,0010 | Supply  |

|                                                    |                 |               |        |        |
|----------------------------------------------------|-----------------|---------------|--------|--------|
| <i>Alternative water source &amp; water supply</i> | Forestry        | Environmental | 0,0002 | Supply |
| <i>Alternative water source &amp; water supply</i> | Water resources | Forestry      | 0,0014 | Supply |
| <i>Alternative water source &amp; water supply</i> | Water supply    | Forestry      | 0,0010 | Supply |
| <i>Competing water interests</i>                   | Forestry        | Agricultural  | 0,0027 | Stress |
| <i>Competing water interests</i>                   | Forestry        | Environmental | 0,0009 | Stress |
| <i>Competing water interests</i>                   | Water resources | Forestry      | 0,0018 | Stress |
| <i>Competing water interests</i>                   | Water supply    | Forestry      | 0,0027 | Stress |
| <i>Permanent water restrictions</i>                | Environmental   | Agricultural  | 0,0433 | Supply |
| <i>Permanent water restrictions</i>                | Forestry        | Agricultural  | 0,0067 | Supply |
| <i>Permanent water restrictions</i>                | Forestry        | Environmental | 0,0176 | Supply |
| <i>Permanent water restrictions</i>                | Water resources | Agricultural  | 0,0245 | Supply |
| <i>Permanent water restrictions</i>                | Water supply    | Forestry      | 0,0201 | Supply |
| <i>Regional water distribution networks</i>        | Forestry        | Agricultural  | 0,0255 | Supply |
| <i>Regional water distribution networks</i>        | Forestry        | Environmental | 0,0065 | Supply |
| <i>Regional water distribution networks</i>        | Water resources | Forestry      | 0,0065 | Supply |
| <i>Regional water distribution networks</i>        | Water supply    | Forestry      | 0,0065 | Supply |
| <i>Reliable water resource for water supply</i>    | Energy          | Agricultural  | 0,0081 | Supply |
| <i>Reliable water resource for water supply</i>    | Forestry        | Agricultural  | 0,0006 | Supply |
| <i>Reliable water resource for water supply</i>    | Forestry        | Environmental | 0,0007 | Supply |
| <i>Reliable water resource for water supply</i>    | Water resources | Energy        | 0,0140 | Supply |
| <i>Reliable water resource for water supply</i>    | Water resources | Forestry      | 0,0007 | Supply |
| <i>Reliable water resource for water supply</i>    | Water supply    | Energy        | 0,0349 | Supply |
| <i>Reliable water resource for water supply</i>    | Water supply    | Forestry      | 0,0013 | Supply |
| <i>Baseline water stress</i>                       | Energy          | Agricultural  | 0,0441 | Stress |
| <i>Baseline water stress</i>                       | Forestry        | Agricultural  | 0,0029 | Stress |
| <i>Baseline water stress</i>                       | Forestry        | Environmental | 0,0029 | Stress |
| <i>Baseline water stress</i>                       | Water resources | Forestry      | 0,0029 | Stress |
| <i>Baseline water stress</i>                       | Water supply    | Forestry      | 0,0163 | Stress |

**S7 – Significant differences in governance factor impact ratings on (a) sectoral drought risk and (b) societal drought risk (p-value <0.05) based on pairwise Wilcoxon Rank sum test, with corrections for multiple testing, using the Benjamini-Hochberg method for p-value adjustment.**

a) Significant difference in governance factor ratings (p-value <0.05) for sectoral drought risk, depending on sectoral focus of respondents

| <i>Governance vulnerability factor</i>                       | <i>Sectors</i>  |               | <i>p-value</i> | <i>subcategory</i> |
|--------------------------------------------------------------|-----------------|---------------|----------------|--------------------|
| <i>Relevant data regarding drought</i>                       | Forestry        | Agricultural  | 0,0385         | Tools              |
| <i>Long-term supply &amp; demand assessments</i>             | Forestry        | Environmental | 0,0203         | Tools              |
| <i>Long-term supply &amp; demand assessments</i>             | Water resources | Forestry      | 0,0203         | Tools              |
| <i>Groundwater monitoring</i>                                | Water resources | Forestry      | 0,0254         | Tools              |
| <i>Groundwater monitoring</i>                                | Water supply    | Forestry      | 0,0254         | Tools              |
| <i>Coordinated Water Strategy (authority level)</i>          | Forestry        | Environmental | 0,0089         | Policies           |
| <i>Coordinated Water Strategy (authority level)</i>          | Water resources | Forestry      | 0,0089         | Policies           |
| <i>Drought plan incl raising awareness (authority level)</i> | Water resources | Forestry      | 0,0393         | Policies           |
| <i>Local water management plan</i>                           | Forestry        | Environmental | 0,0077         | Policies           |
| <i>Local water management plan</i>                           | Water resources | Forestry      | 0,0077         | Policies           |
| <i>Water transfer and drought policies</i>                   | Forestry        | Environmental | 0,0295         | Policies           |
| <i>Water transfer and drought policies</i>                   | Water resources | Forestry      | 0,0207         | Policies           |
| <i>Defined water use rights</i>                              | Forestry        | Agricultural  | 0,0483         | Policies           |
| <i>Defined water use rights</i>                              | Forestry        | Energy        | 0,0483         | Policies           |
| <i>Defined water use rights</i>                              | Forestry        | Environmental | 0,0121         | Policies           |
| <i>Defined water use rights</i>                              | Water resources | Forestry      | 0,0138         | Policies           |
| <i>Defined water use rights</i>                              | Water supply    | Forestry      | 0,0194         | Policies           |

b) Significant difference in governance factor ratings (p-value <0.05) for societal drought risk depending on respondents' place of employment

| <i>Governance vulnerability factor</i>              | <i>Sectors</i> |           | <i>p-value</i> | <i>subcategory</i> |
|-----------------------------------------------------|----------------|-----------|----------------|--------------------|
| <i>Water transfer and drought policies</i>          | Research       | Authority | 0,04467        | Policies           |
| <i>Financial capacity of the government*</i>        | Company        | Authority | 0,038918       | Authority          |
| <i>Financial capacity of the government*</i>        | Research       | Authority | 0,038918       | Authority          |
| <i>Social/physical capacity within authorities*</i> | Company        | Authority | 0,004864       | Authority          |
| <i>Social/physical capacity within authorities*</i> | Research       | Authority | 0,026956       | Authority          |
